# Supplementary material
Source: Research Square preprint supplement (doi:10.21203/rs.3.rs-9644212/v1)
Supplement: Supplementary file 1 [file 473b347e3b3813ccc1271741.docx]

*Supplementary material to the*

*Brief report / Short communication*

**Airborne fungal spores over Pannonian plain – full season measurements following the standard Hirst volumetric method**

Branko Sikoparija1*, Isidora Simović1, Marijana Vasić2, Ljiljana Janjušević1, Ljiljana Šašić Zorić1

1BioSensе Institute - Research Institute for Information Technologies in Biosystems, University of Novi Sad, Novi Sad, Serbia

2Department for Biology and Ecology, Faculty of Sciences, University of Novi Sad, Novi Sad, 21000, Serbia

*Corresponding author: Branko Sikoparija, BioSensе Institute – Research Institute for Information Technologies in Biosystems, University of Novi Sad, Dr Zorana Djindjica 1, 21000 Novi Sad, Serbia; e-mail: sikoparijabranko@biosense.rs

Supplementary Figure S1. Micrographs depicting morphology of identified fungal spores: (A) *Alternaria,* (B) *Cladosporium,* (C) *Epicoccum,* (D) *Ganoderma*), (E) Agaricaceae-morphotype, (F) Drechslera-morphotype.

| (A)  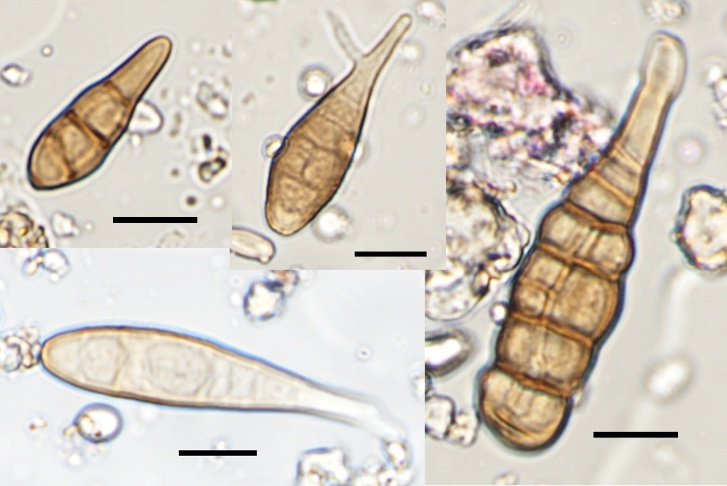 | (B)  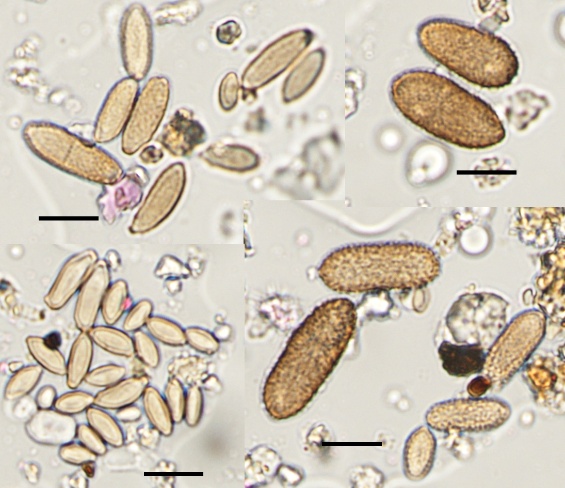 | (C)  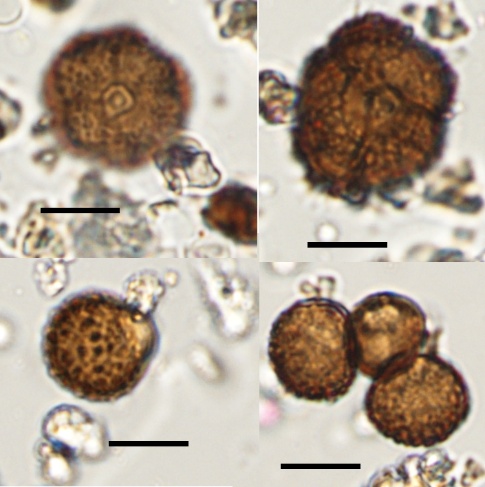 |
| --- | --- | --- |
| (D)  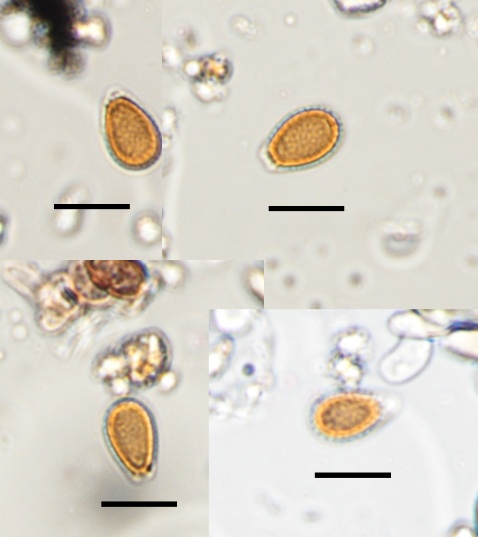 | (E)  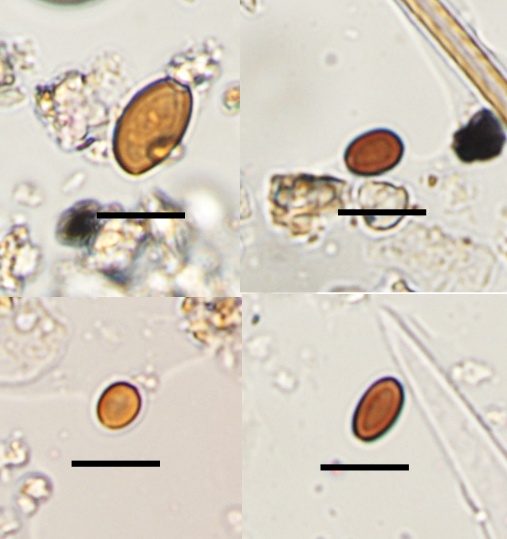 | (F)  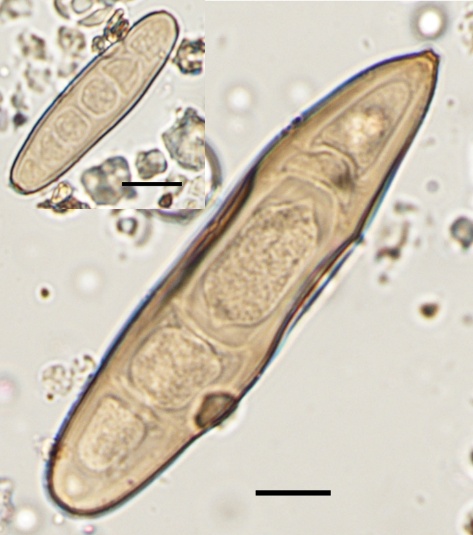 |

Supplementary Figure S2. Box and whiskers plots of diurnal variation in identified fungal spores: (A) from 6 April 2023 to 5 April 2024, (B) May-November, (C) December-April (“X” indicates mean value). Mind the difference in y-axis.

| (A)  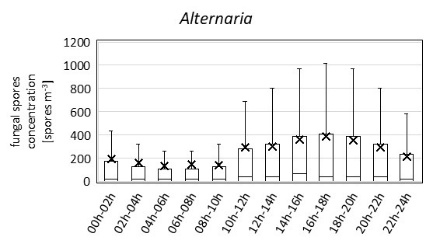 | (B)  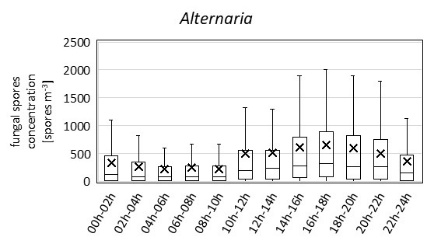 | (C)  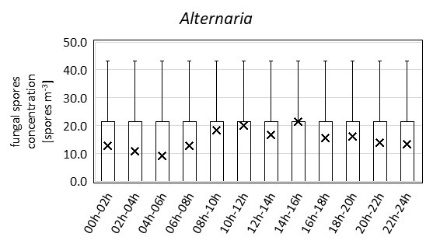 |
| --- | --- | --- |
| 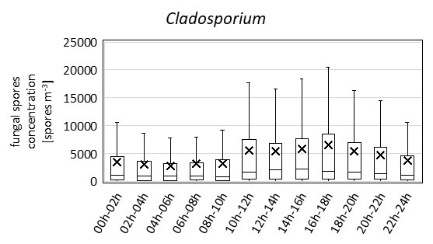 | 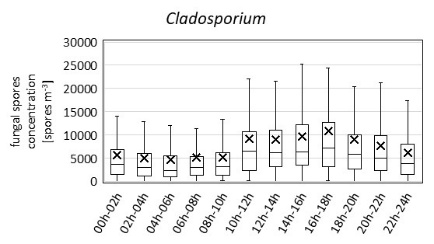 | 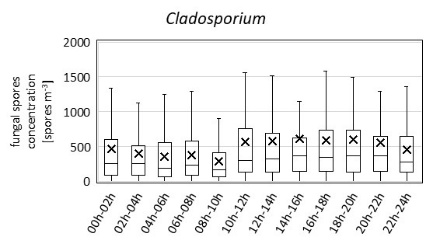 |
| 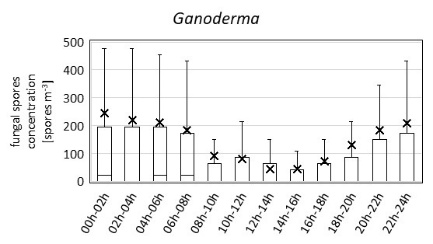 | 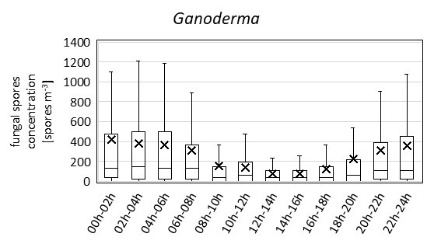 | 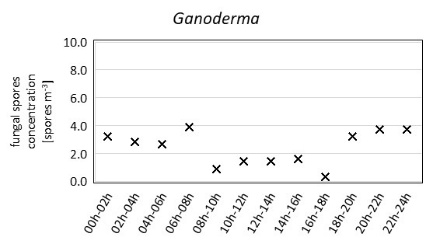 |
| 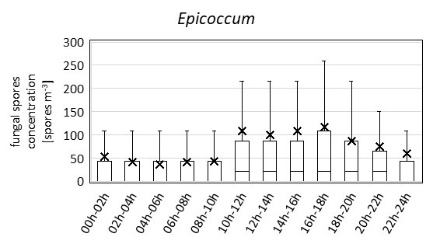 | 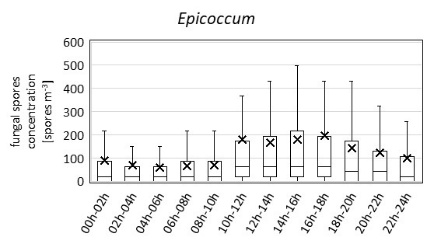 | 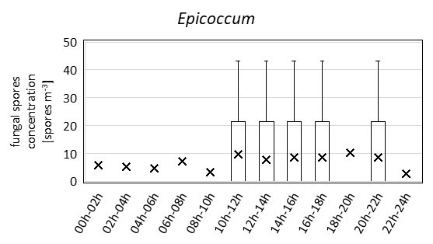 |
| 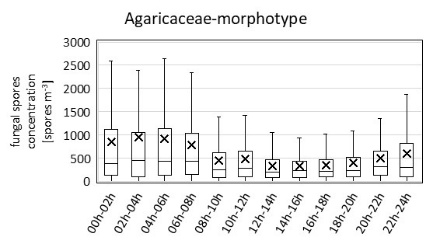 | 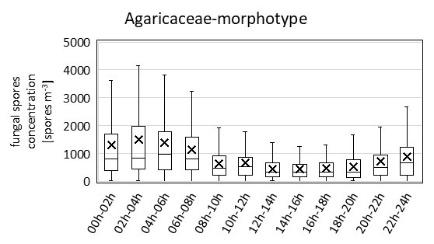 | 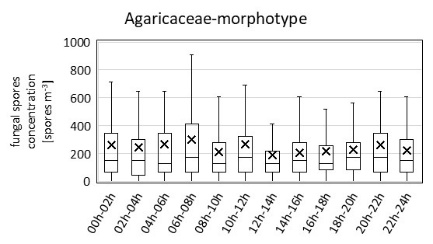 |
| 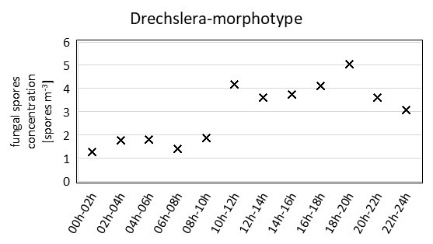 | 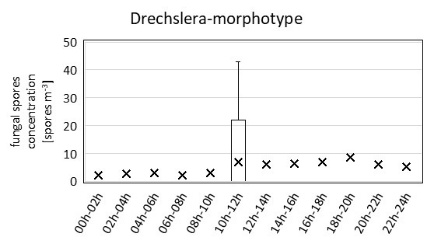 | 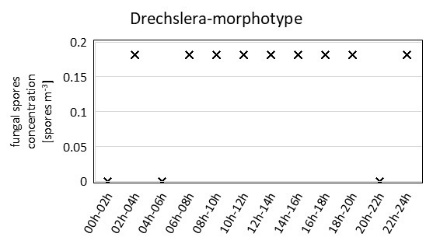 |

Supplementary Table S2. Spearman’s Rho, correlation coefficients calculated for daily concentrations of airborne fungal spores and meteorological parameters: maximal air temperature (Tmax), minimal air temperature (Tmin), average air temperature (Tavg), average relative humidity (RH), average water vapor pressure (WVP), average wind speed (WS), average cloudiness (CL), insolation hours (IH), precipitation sum (PP) in the intensive season (May-November).

| INTENSIVE SEASON (May-November) | Total fungal spores | Unidentified | *Alternaria* | *Cladosporium* | Agaricaceae-morphotype | Drechslera-morphotype | *Epicoccum* | *Ganoderma* |
| --- | --- | --- | --- | --- | --- | --- | --- | --- |
| Tmax | 0.595** | 0.148* | 0.754** | 0.594** | 0.270** | 0.653** | 0.592** | 0.717** |
| Tmin | 0.570** | 0.393** | 0.634** | 0.554** | 0.180** | 0.523** | 0.463** | 0.567** |
| Tavg | 0.574** | 0.192** | 0.715** | 0.569** | 0.254** | 0.641** | 0.543** | 0.662** |
| RH | -0.118 | 0.331** | -0.358** | -0.162* | -0.010 | -0.361** | -0.285** | -0.266** |
| WVP | 0.586** | 0.420** | 0.623** | 0.560** | 0.255** | 0.534** | 0.457** | 0.593** |
| WS | -0.169* | 0.028 | -0.167* | -0.133* | -0.303** | -0.245** | -0.154* | -0.284** |
| IH | 0.239** | -0.128* | 0.406** | 0.261** | 0.117 | 0.487** | 0.250** | 0.351** |
| CL | -0.214** | 0.219** | -0.388** | -0.237** | -0.149* | -0.408** | -0.349** | -0.410** |
| PP | -0.075 | 0.368** | -0.271** | -0.106 | -0.127* | -0.263** | -0.287** | -0.240** |

* p<0.05, **p<0.01

Supplementary Table S2. Spearman’s Rho correlation coefficients calculated for daily concentrations of airborne fungal spores and meteorological parameters: maximal air temperature (Tmax), minimal air temperature (Tmin), average air temperature (Tavg), average relative humidity (RH), average water vapor pressure (WVP), average wind speed (WS), average cloudiness (CL), insolation hours (IH), precipitation sum (PP) measured in the low season (December-April).

| LOW SEASON (December-April) | Total fungal spores | Unidentified | *Alternaria* | *Cladosporium* | Agaricaceae-morphotype | Drechslera-morphotype | *Epicoccum* | *Ganoderma* |
| --- | --- | --- | --- | --- | --- | --- | --- | --- |
| Tmax | 0.580** | 0.365** | 0.486** | 0.518** | 0.545** | 0.253** | 0.174* | 0.354** |
| Tmin | 0.615** | 0.425** | 0.504** | 0.544** | 0.546** | 0.223** | 0.073 | 0.312** |
| Tavg | 0.610** | 0.420** | 0.513** | 0.546** | 0.569** | 0.240** | 0.156 | 0.348** |
| RH | -0.284** | -0.036 | -0.265** | -0.278** | -0.295** | 0.017 | -0.165* | -0.069 |
| WVP | 0.653** | 0.526** | 0.522** | 0.581** | 0.583** | 0.310** | 0.141 | 0.402** |
| WS | 0.095 | 0.048 | 0.250** | 0.074 | 0.063 | -0.015 | 0.066 | -0.063 |
| IH | 0.049 | -0.017 | 0.132 | 0.055 | 0.067 | 0.028 | 0.098 | 0.110 |
| CL | 0.169* | 0.186* | 0.136 | 0.124 | 0.102 | 0.006 | -0.110 | -0.016 |
| PP | 0.099 | 0.273** | 0.093 | 0.029 | 0.078 | 0.079 | -0.020 | -0.004 |

* p<0.05, **p<0.01
